# Supplementary material for: Simultaneous Determination of Pesticide Residues and Mycotoxins in Storage Pu-erh Tea Using Ultra-High-Performance Liquid Chromatography Coupled with Tandem Mass Spectrometry
Source: MDPI journal article supplement (doi:10.3390/molecules28196883), 2023-09-30
Supplement: s1 [file s1]

# Simultaneous Determination of Pesticide Residues and Mycotoxins in Storage Pu-erh Tea Using Ultra-High-Performance Liquid Chromatography Coupled with Tandem Mass Spectrometry

Siu Leung Chau <sup>1</sup>, Aihua Zhao <sup>2</sup>, Wei Jia <sup>1</sup> and Lu Wang <sup>1,\*</sup>

<sup>1</sup> School of Chinese Medicine, Hong Kong Baptist University, Kowloon Tong, Hong Kong, China; slchau@hkbu.edu.hk (S.L.C.); weijia1@hkbu.edu.hk (W.J.)

<sup>2</sup> Shanghai Sixth People's Hospital Affiliated to Shanghai Jiao Tong University School of Medicine, Shanghai 200023, China; zhah@sjtu.edu.cn

\* Correspondence: luwang1@hkbu.edu.hk

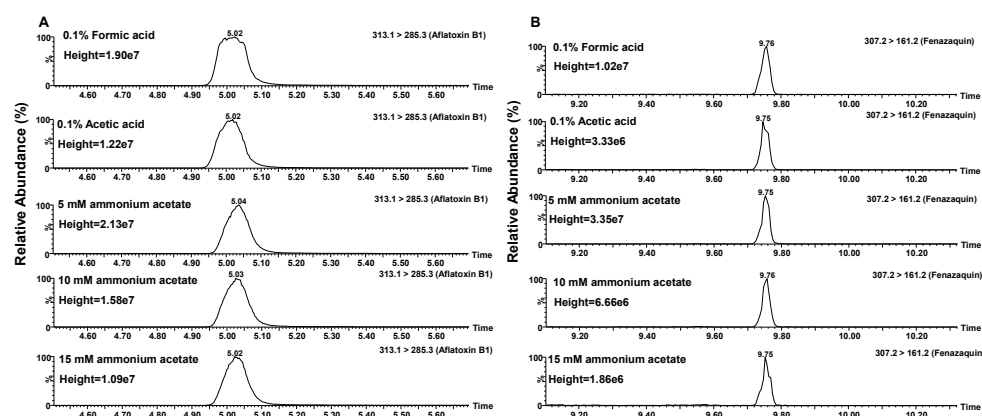

Figure S1. MRM chromatograms of aflatoxin B<sub>1</sub> (A) and fenazaquin (B) with 0.1% formic acid, 0.1% acetic acid and 5, 10 and 15 mM ammonia acetate as mobile phase modifiers.

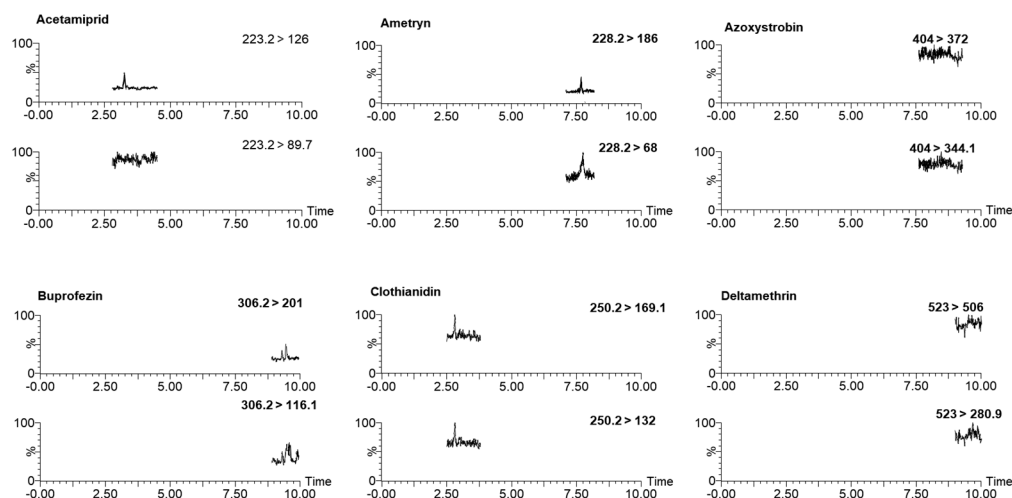

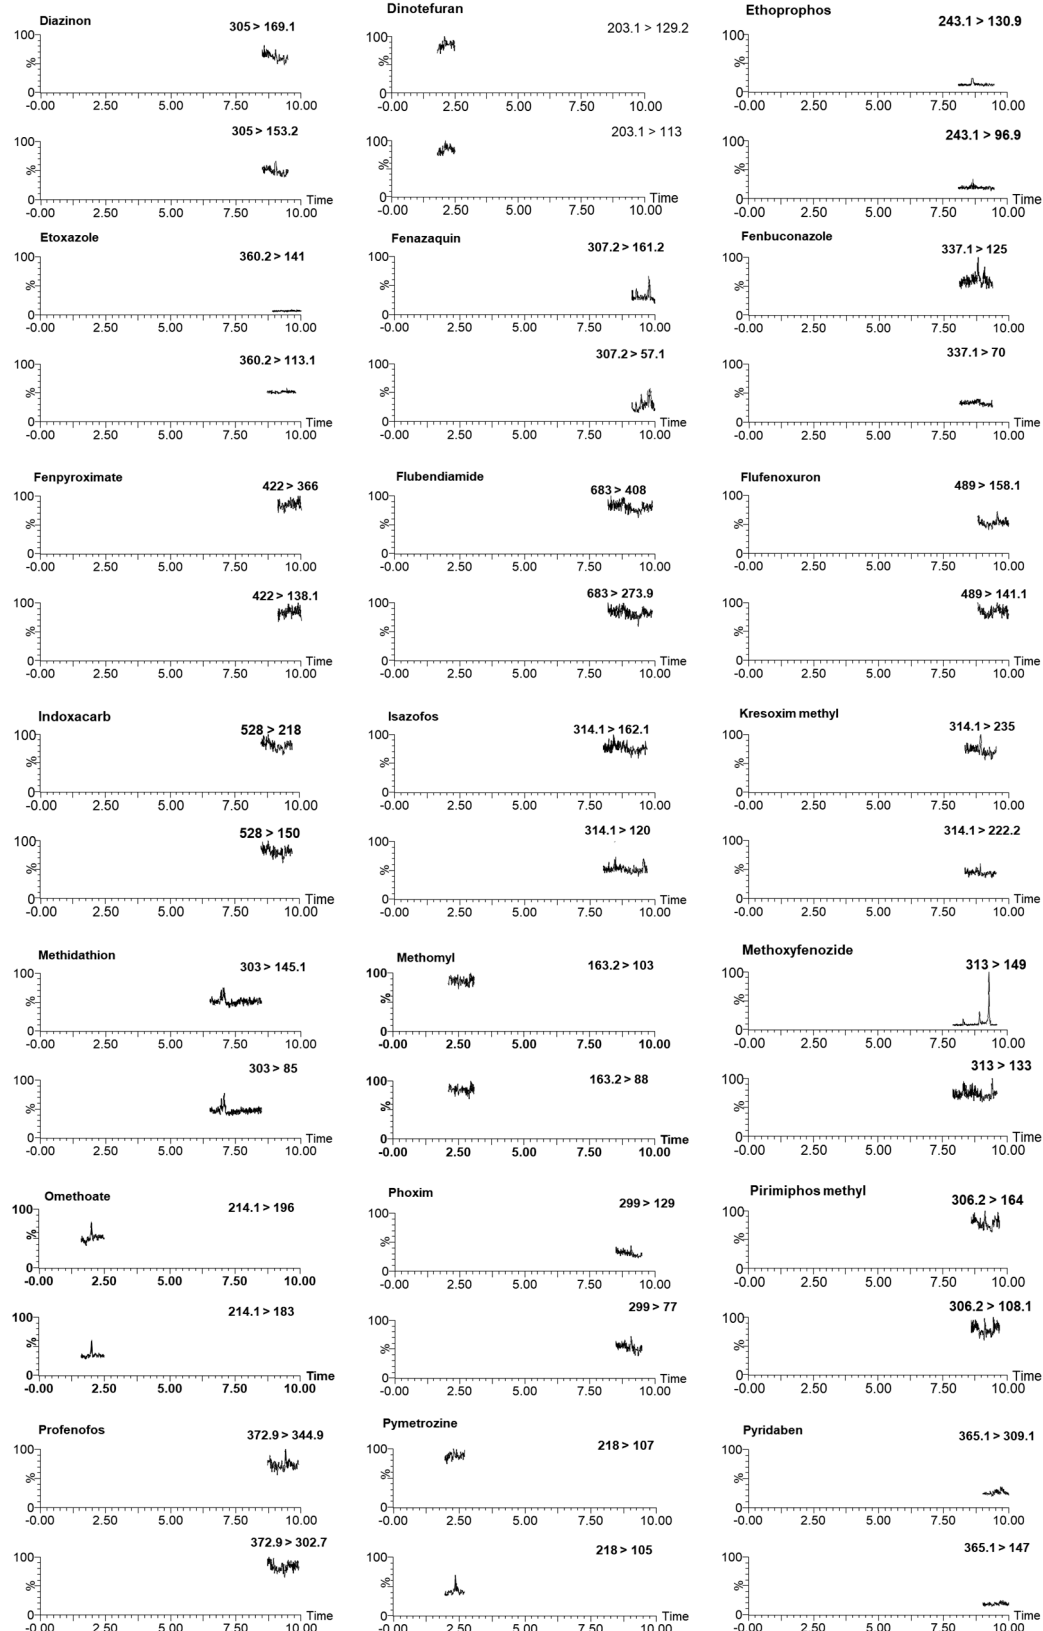

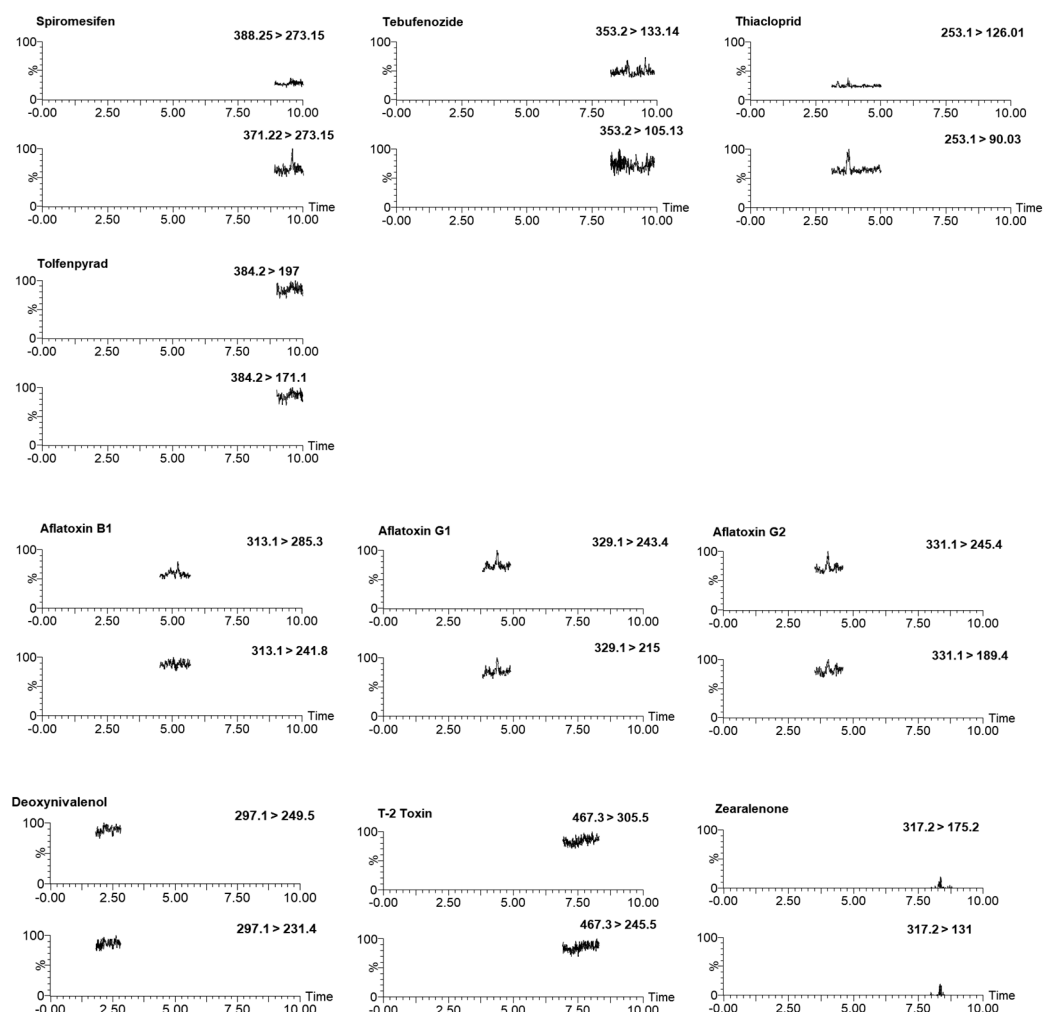

Figure S2. Representative UPLC-MS/MS chromatograms obtained from a blank Pu-erh tea sample.

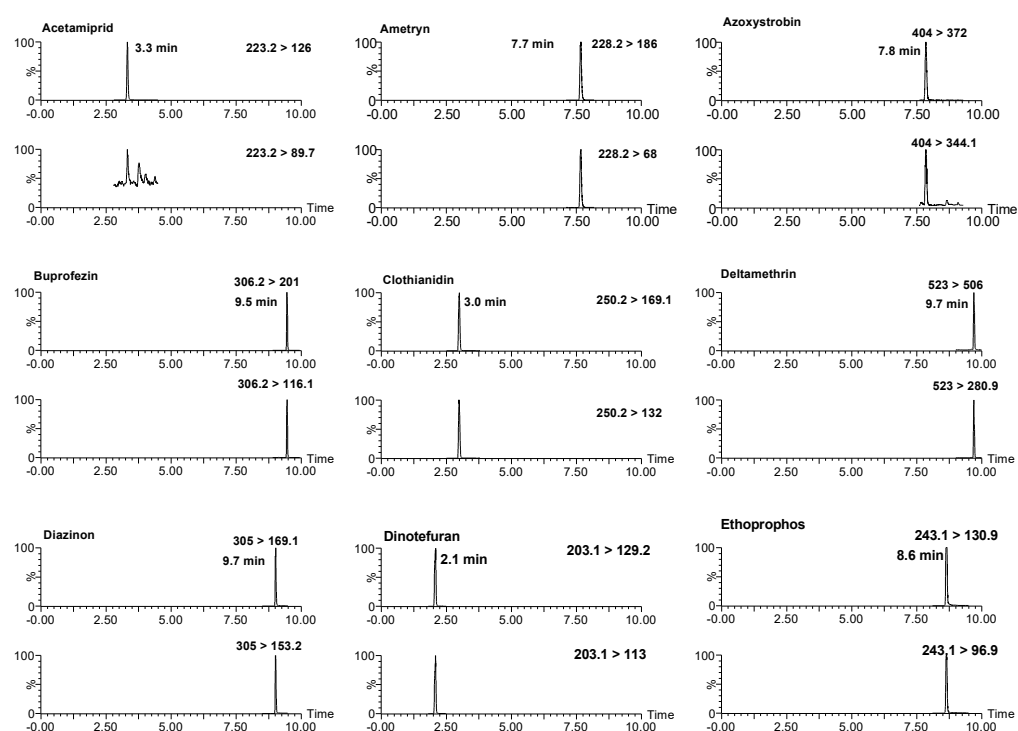

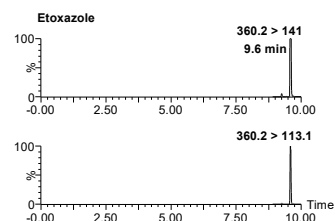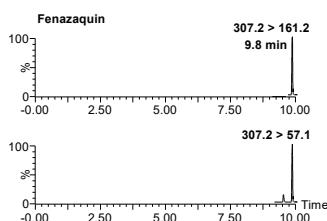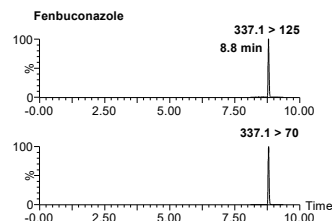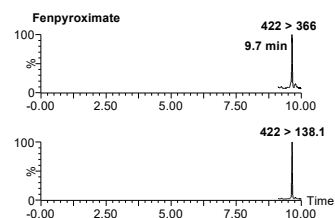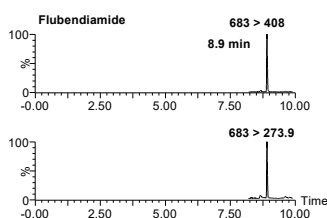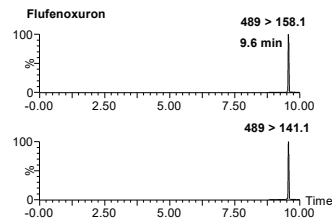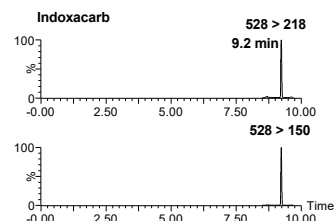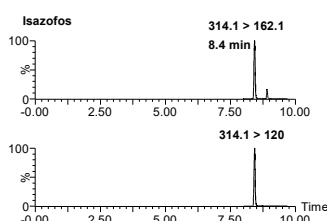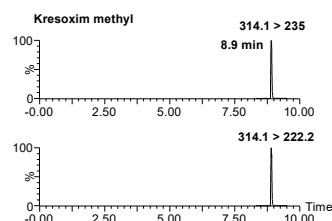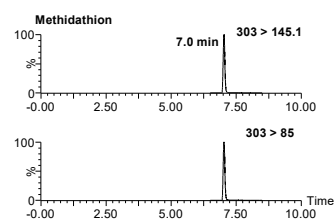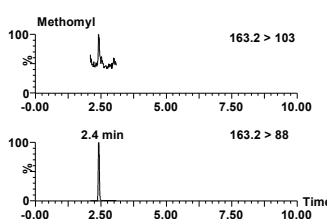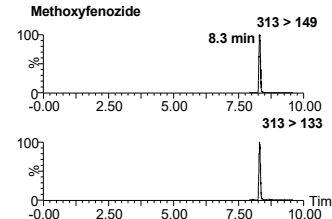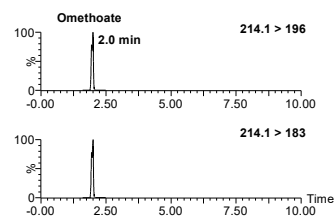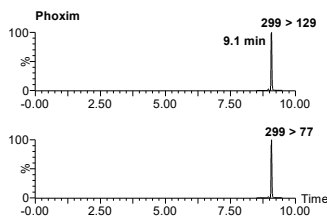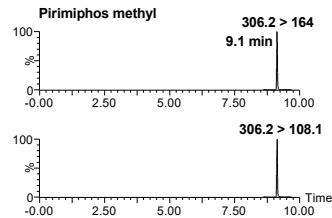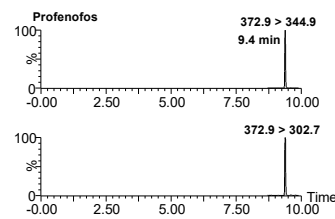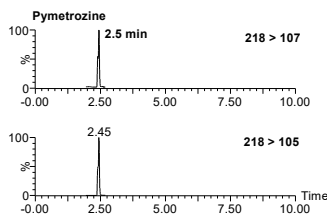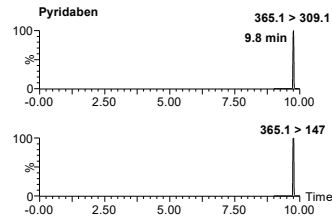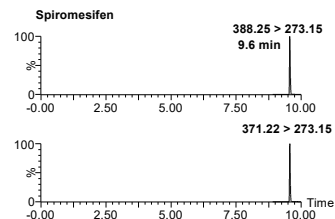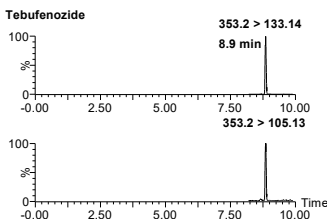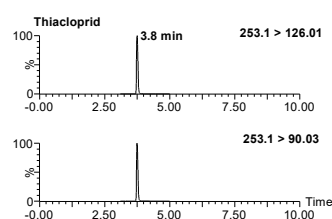

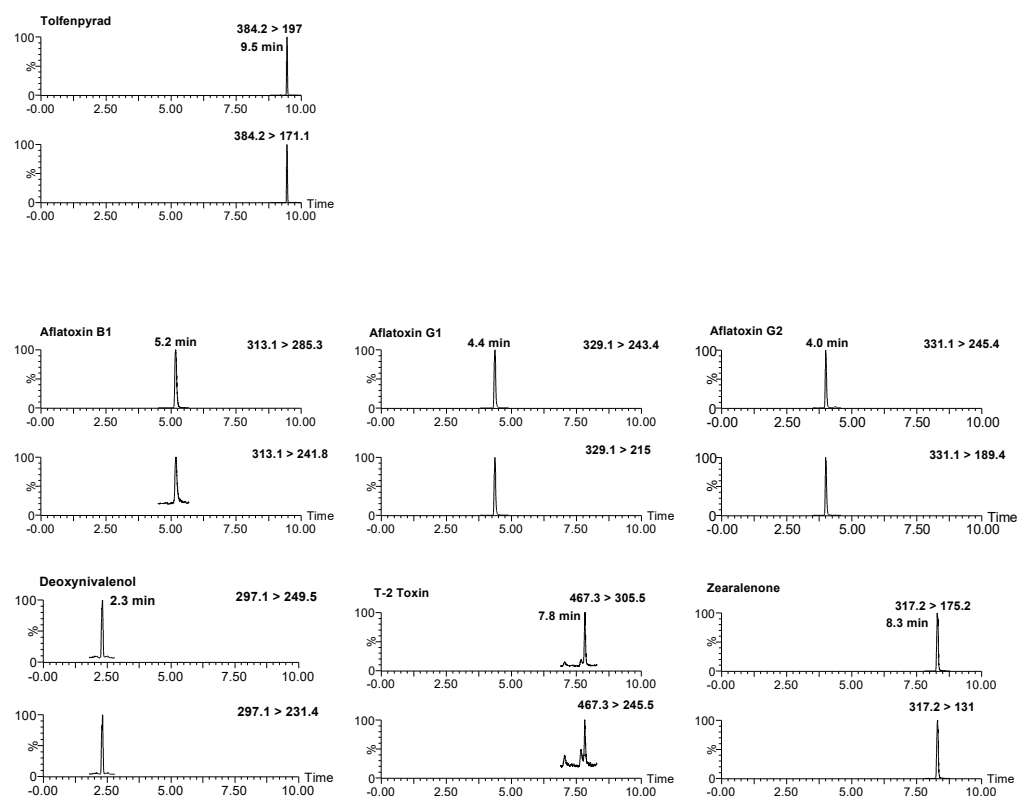

Figure S3. Representative UPLC-MS/MS chromatograms obtained from a standard in the solvent mixture.
